# Supplementary material for: Designed synthesis of a series of zwitterion–polyoxometalate hybrid materials for selective scavenging and photolysis of dyes
Source: Royal Society of Chemistry journal article supplement (doi:10.1039/c5dt00577a), 2015-01-01
Supplement: c5dt00577a1.pdf [file c5dt00577a1.pdf]

Supporting Information for

**Designed synthesis of a series of zwitterion-polyoxometalate hybrid materials for selective scavenging and photolysis of dyes**

Sha Ou, Jun-Ping Zheng, Guo-Qiang Kong and Chuan-De Wu\*

*Center for Chemistry of High-Performance and Novel Materials, Department of Chemistry, Zhejiang University, Hangzhou, 310027, P. R. China*

*E-mail address: cdwu@zju.edu.cn*

**Figures:**

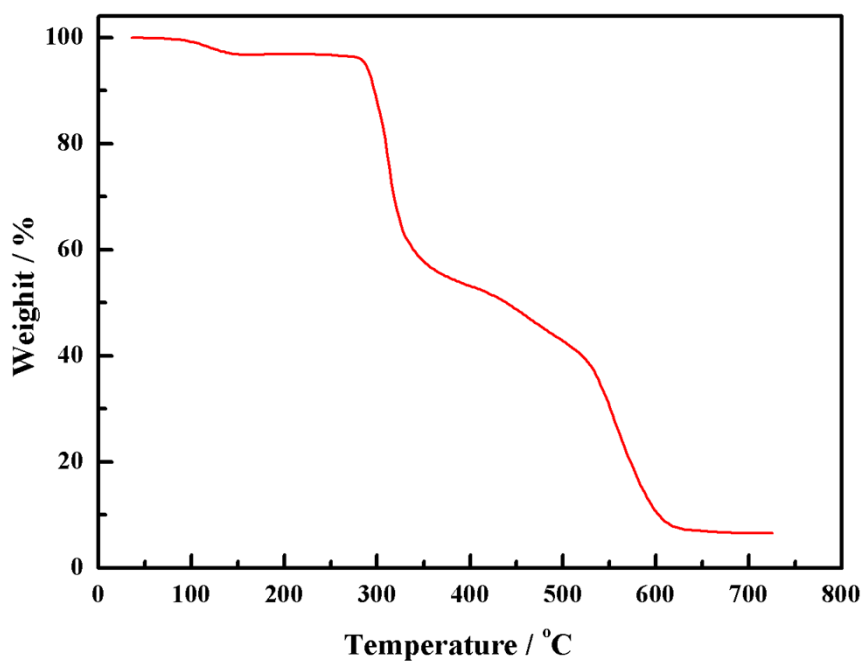

**Fig. S1.** TGA result of **1**.

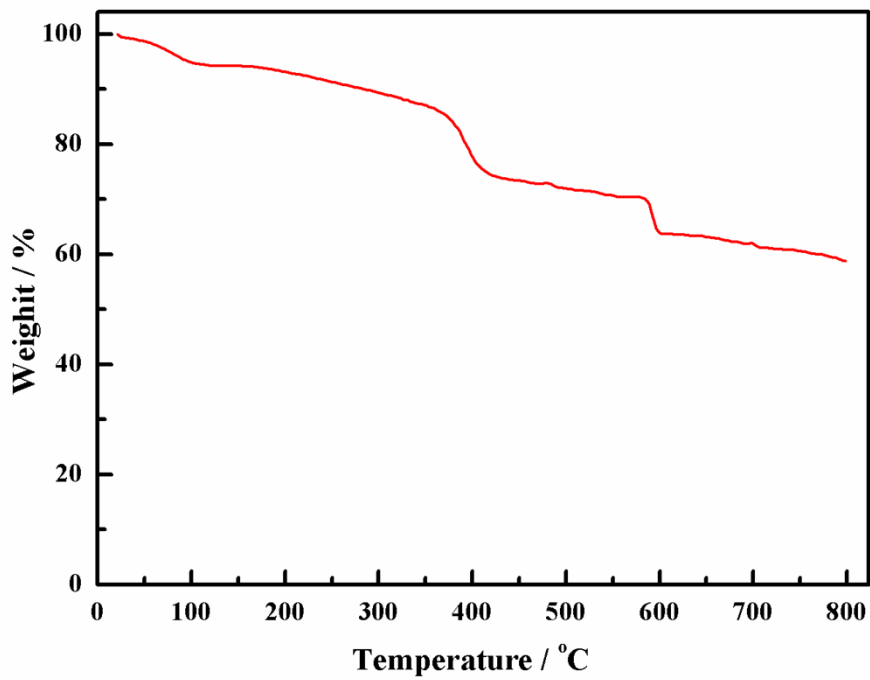

Fig. S2. TGA result of 2.

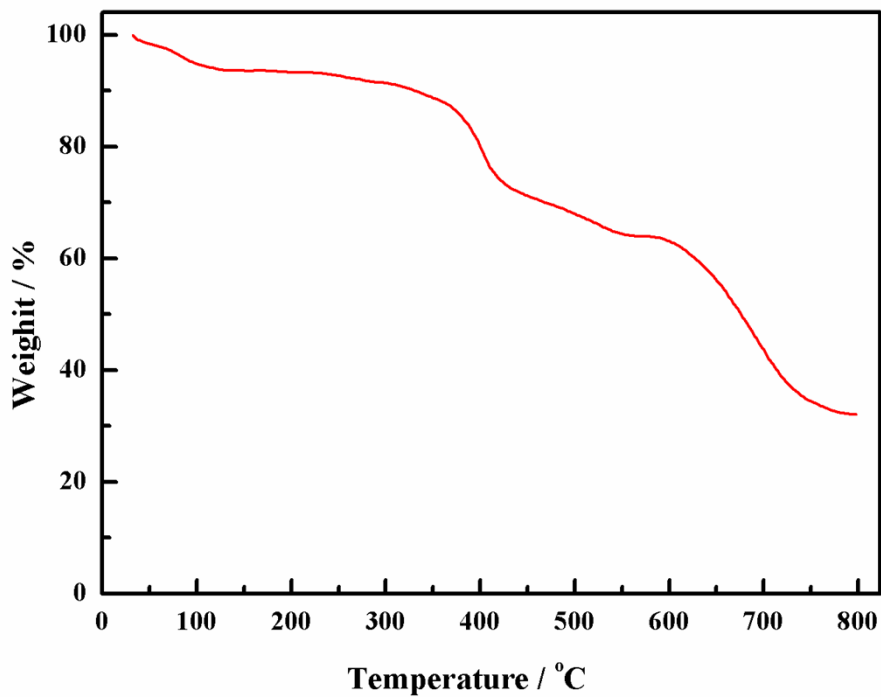

Fig. S3. TGA result of 3.

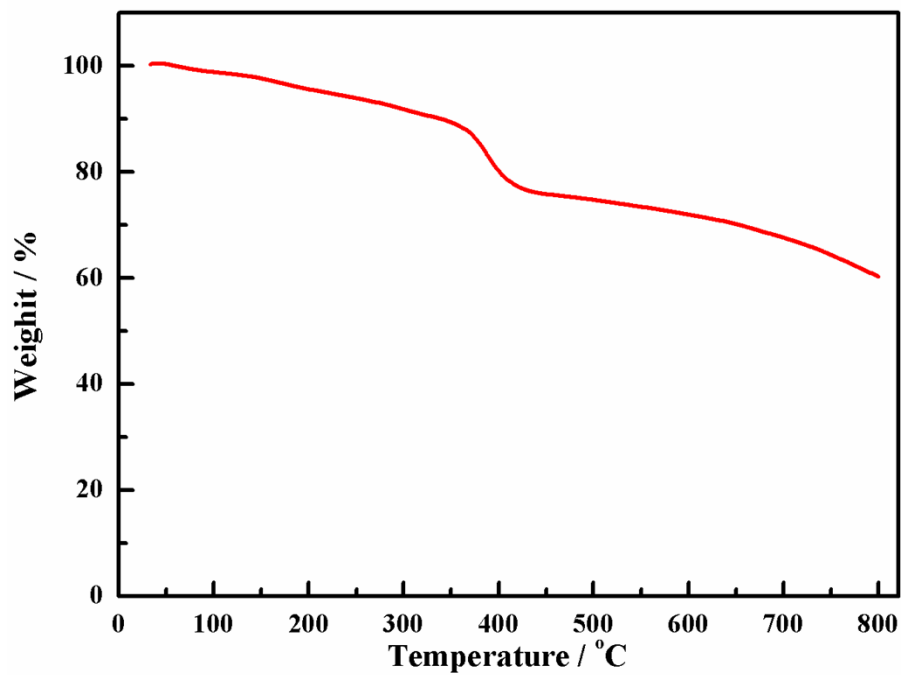

**Fig. S4.** TGA result of 4.

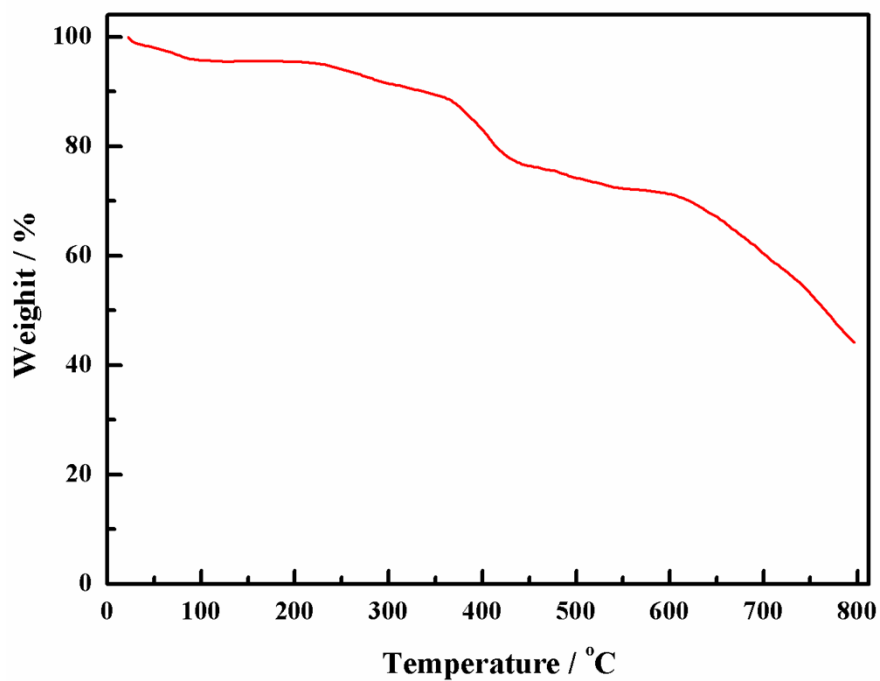

**Fig. S5.** TGA result of 5.

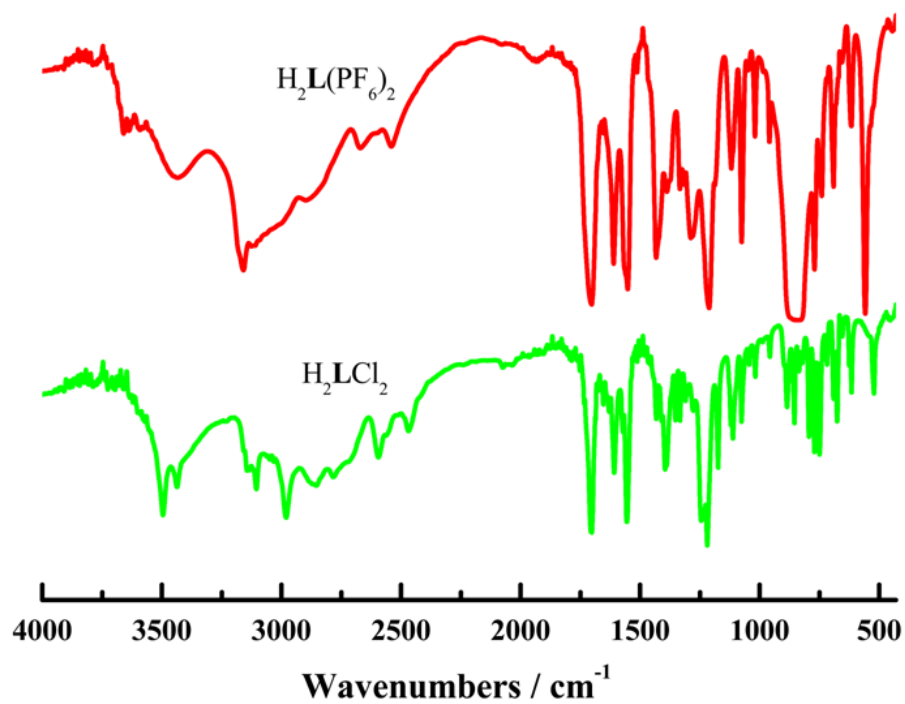

**Fig. S6.** FT-IR spectra of  $H_2LCl_2$  and  $H_2LPF_6$ .

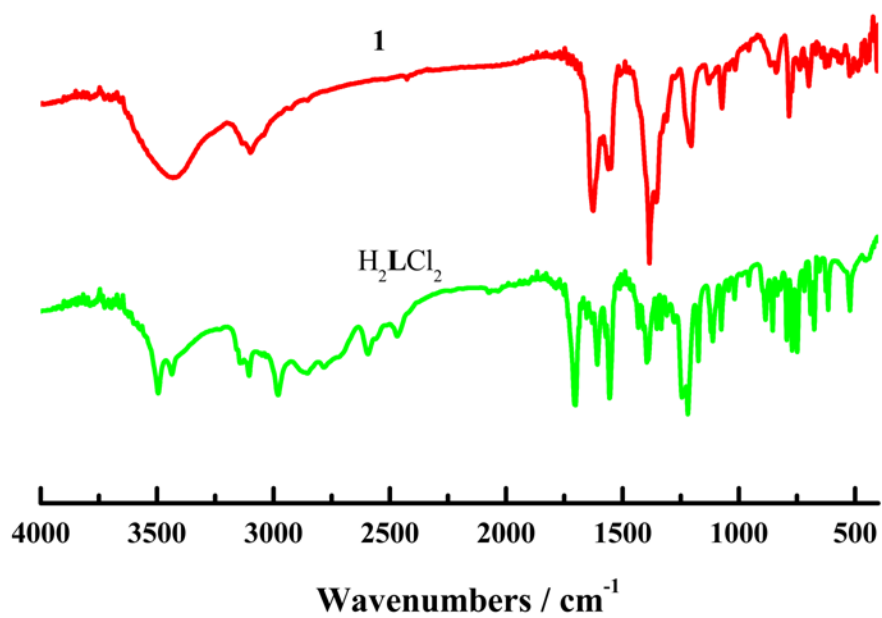

**Fig. S7.** FT-IR spectra of compound **1** and  $H_2LCl_2$ .

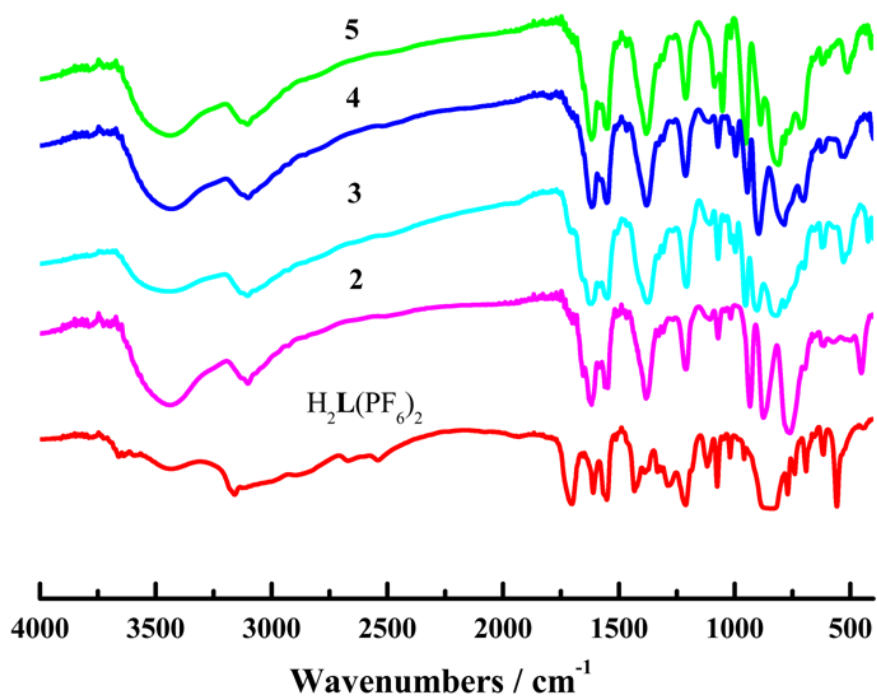

**Fig. S8.** FT-IR spectra for compounds 2-5 and  $H_2L(PF_6)_2$ .

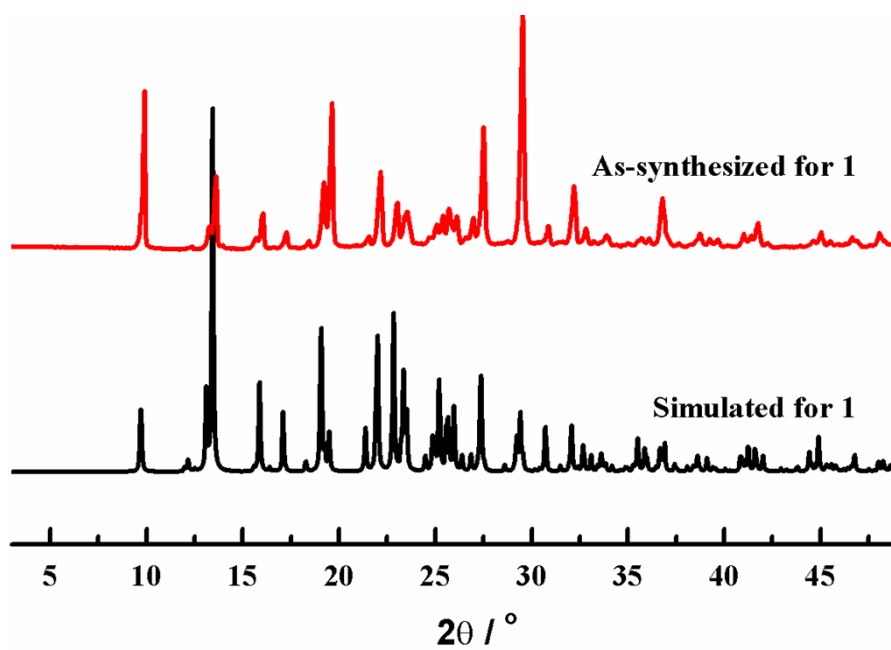

**Fig. S9.** Powder X-ray diffraction patterns for 1.

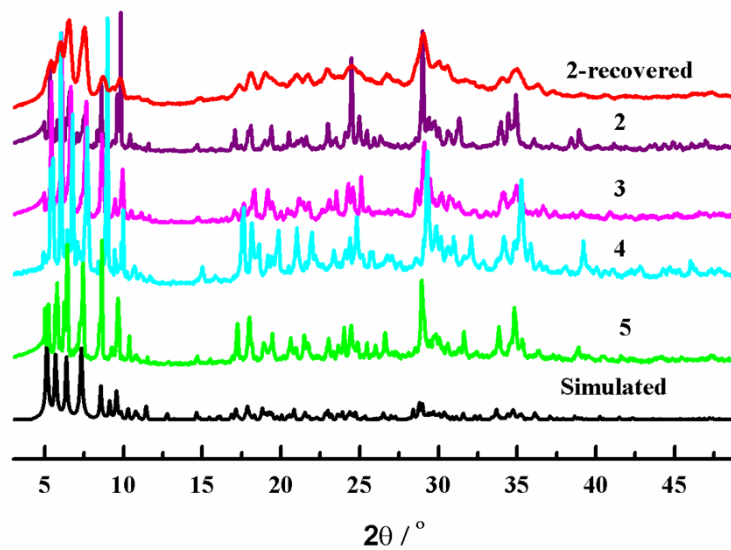

**Fig. S10.** Powder X-ray diffraction patterns for 2-5.

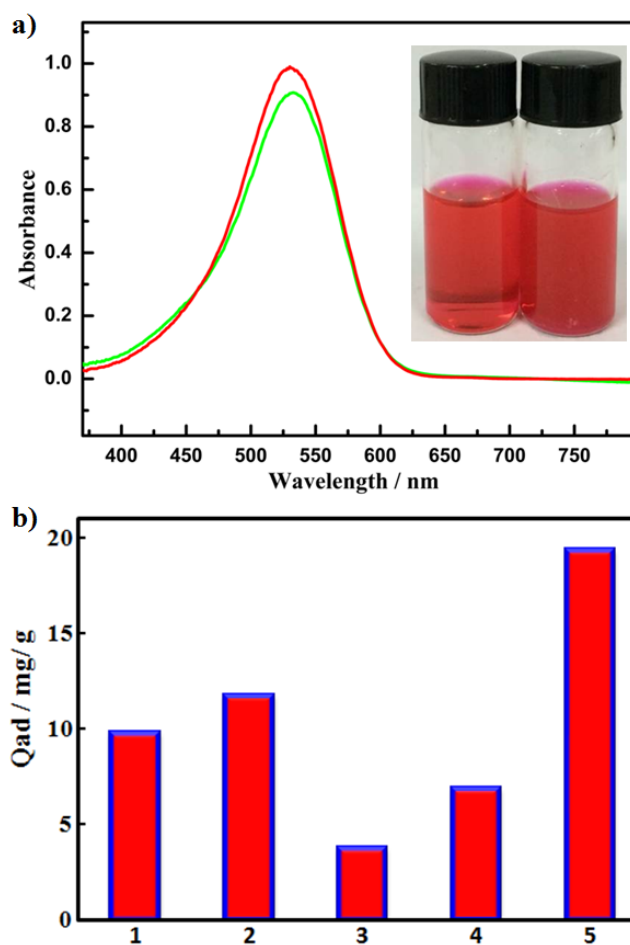

**Fig. S11.** (a) UV-Vis spectra of NR before (red line) and after (green line) addition of compound 2 (the inserted pictures highlight the scavenging effect); (b) neutral red capture capacities of 1-5.

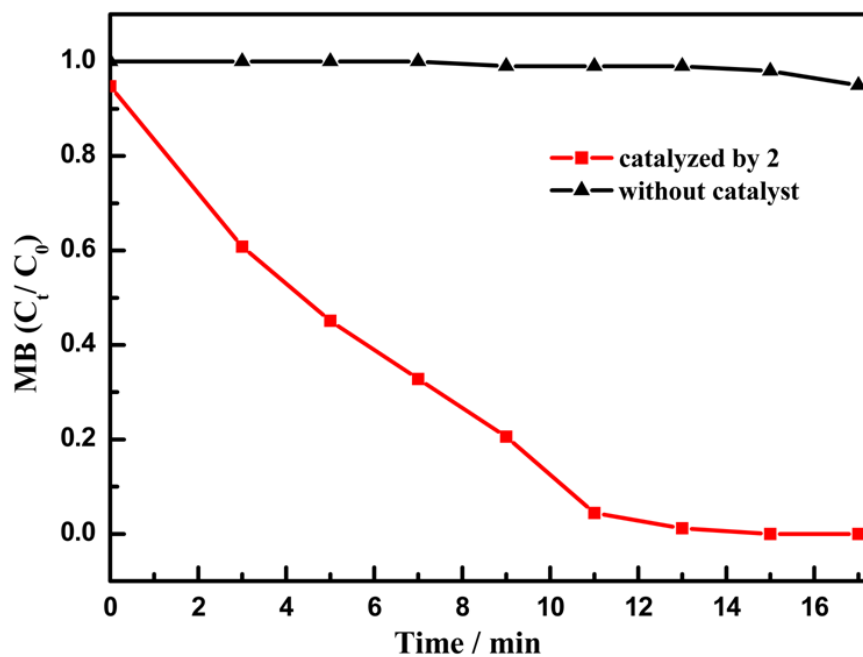

**Fig. S12.** Photocatalytic property of compound **2** for degradation of MB in water under a 300 W Xe lamp irradiation.

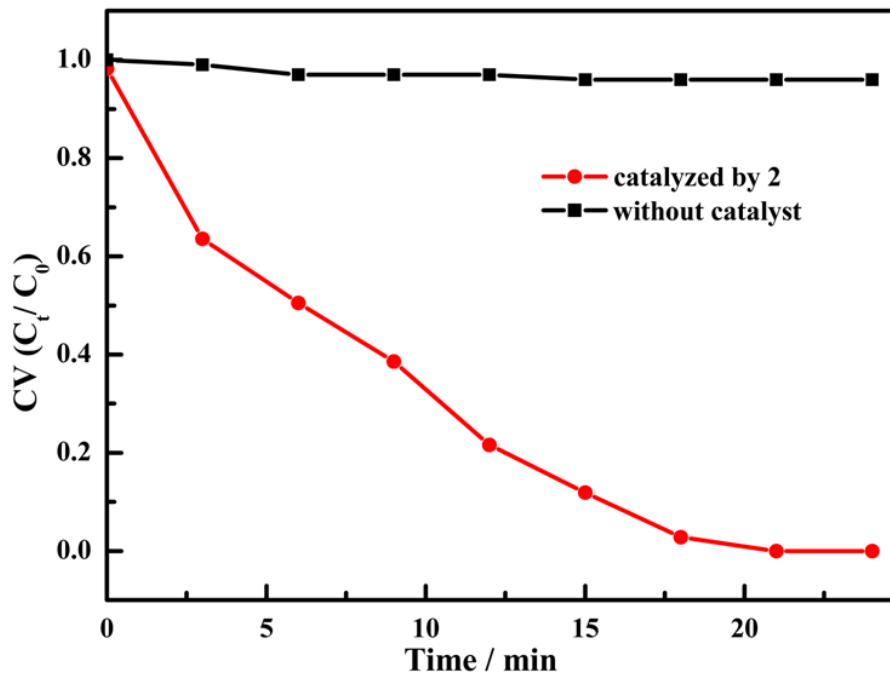

**Fig. S13.** Photocatalytic property of compound **2** for degradation of CV in water under a 300 W Xe lamp irradiation.

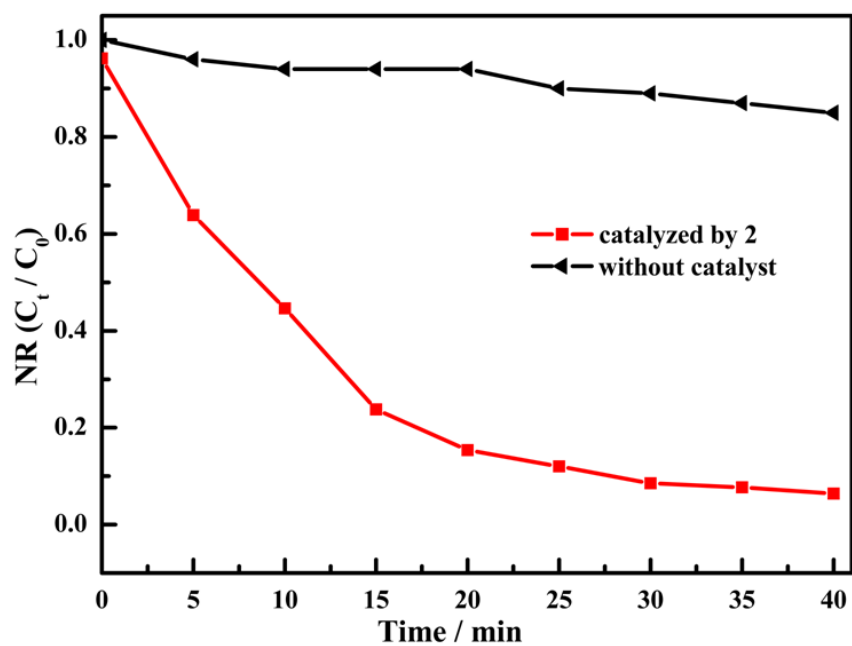

**Fig. S14.** Photocatalytic property of compound **2** for degradation of NR in water under a 300 W Xe lamp irradiation.

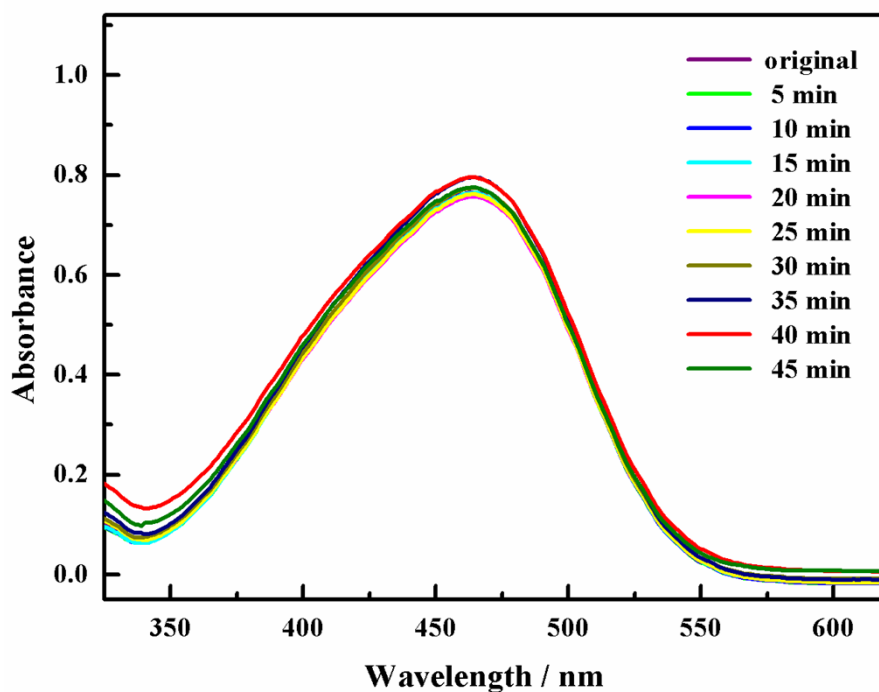

**Fig. S15.** UV-Vis spectra of MO in water after irradiated with a 300 W Xe lamp in the presence of compound **2**.



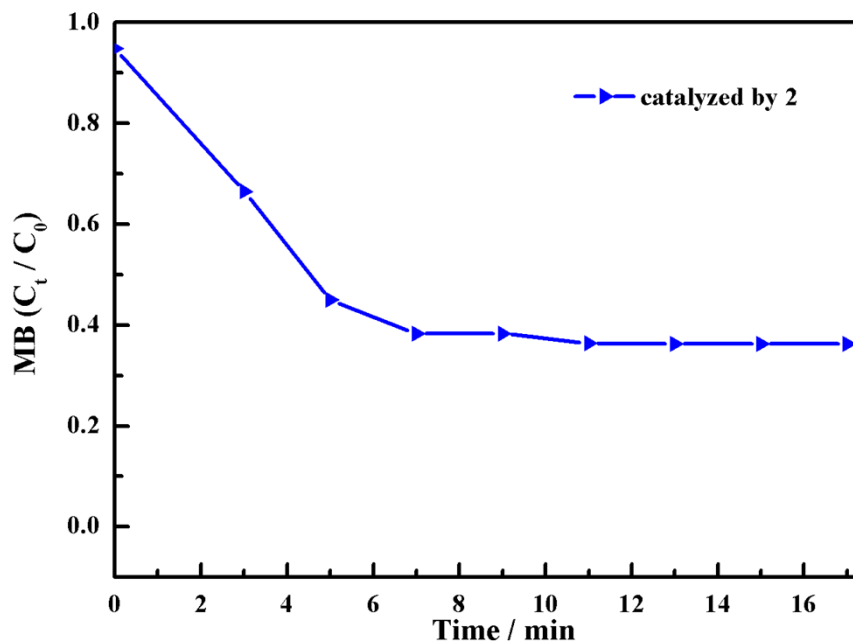

**Fig. S16.** Photolysis of MB catalyzed by compound **2** under a 300 W Xe lamp irradiation (after 7 min, the solid catalyst was removed by centrifugation).

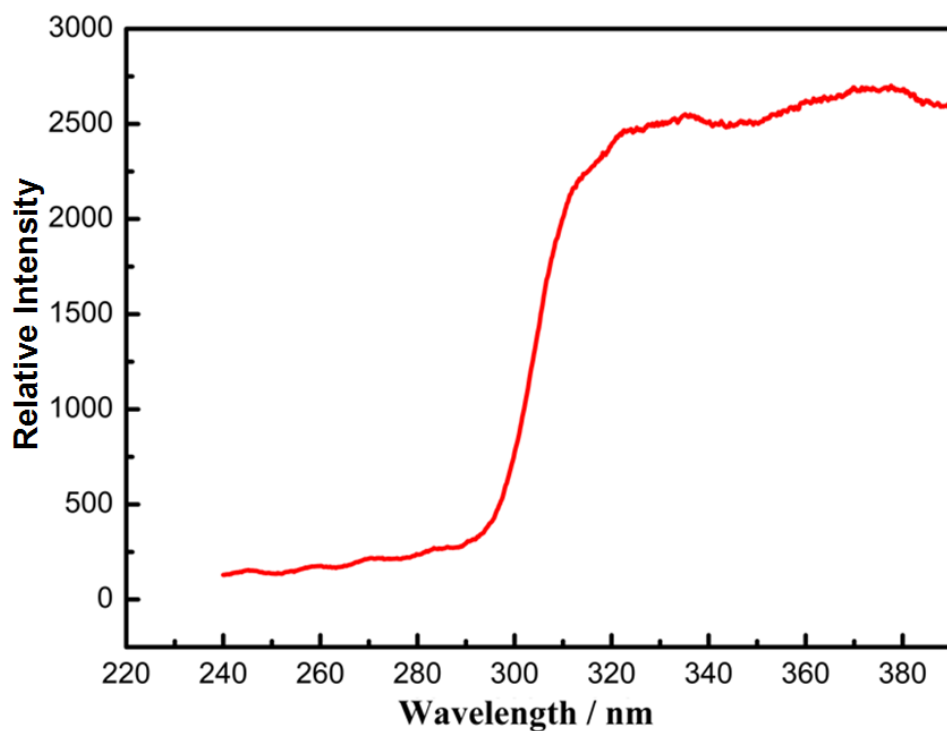

**Fig. S17.** The excitation spectrum of  $H_2L$  in the solid state at room temperature (monitored at 444 nm).

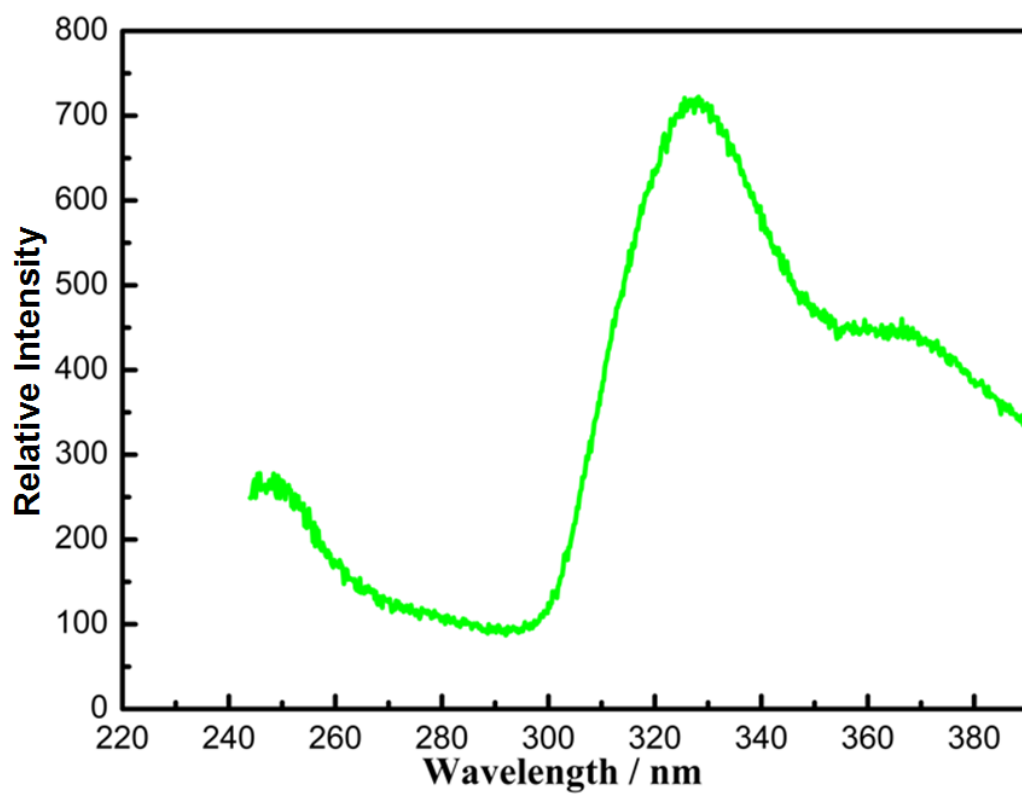

**Fig. S18.** The excitation spectrum of compound **1** in the solid state at room temperature (monitored at 444 nm).

**Tables:****Table S1.** Selected bond lengths (Å) and angles (°) for **1**

| Bond length | (Å)      | Bond angle                     | (°)        | Bond angle        | (°)        |
|-------------|----------|--------------------------------|------------|-------------------|------------|
| Zn(1)-O(1)  | 1.970(5) | O(1) <sup>i</sup> -Zn(1)-O(1)  | 91.3(3)    | O(1)-Zn(1)-Cl(1)  | 106.18(17) |
| Zn(1)-Cl(2) | 2.260(3) | O(1) <sup>i</sup> -Zn(1)-Cl(2) | 113.44(17) | Cl(2)-Zn(1)-Cl(1) | 121.81(11) |
| Zn(1)-Cl(1) | 2.279(3) |                                |            |                   |            |

Symmetry transformations used to generate equivalent atoms: i) x, -y+3/2, z.

**Table S2.** Selected bond lengths (Å) and angles (°) for **2**

| Bond length               | (Å)       | Bond angle                                 | (°)       | Bond angle                                      | (°)      |
|---------------------------|-----------|--------------------------------------------|-----------|-------------------------------------------------|----------|
| W(1)-O(6)                 | 1.75(2)   | O(6)-W(1)-O(17)                            | 100.4(9)  | O(4)-W(4)-O(16)                                 | 87.2(8)  |
| W(1)-O(17)                | 1.851(17) | O(6)-W(1)-O(16)                            | 101.3(9)  | O(19)-W(4)-O(10)                                | 103.3(9) |
| W(1)-O(16)                | 1.911(16) | O(6)-W(1)-O(9)                             | 104.3(10) | O(16)-W(4)-O(10)                                | 86.1(7)  |
| W(1)-O(9)                 | 1.926(19) | O(17)-W(1)-O(9)                            | 87.6(6)   | O(19)-W(4)-O(8)                                 | 101.0(9) |
| W(1)-O(13)                | 1.98(2)   | O(16)-W(1)-O(9)                            | 86.9(7)   | O(4)-W(4)-O(8)                                  | 88.7(9)  |
| W(2)-O(20)                | 1.58(2)   | O(6)-W(1)-O(13)                            | 103.8(10) | O(10)-W(4)-O(8)                                 | 87.8(9)  |
| W(2)-O(9)                 | 1.87(2)   | O(17)-W(1)-O(13)                           | 86.9(7)   | O(4)-W(4)-O(2)                                  | 89.5(9)  |
| W(2)-O(14)                | 1.88(2)   | O(16)-W(1)-O(13)                           | 88.2(7)   | O(8)-W(4)-O(2)                                  | 93.9(7)  |
| W(2)-O(10)                | 1.88(2)   | O(16)-W(1)-O(1)                            | 92.5(7)   | O(16)-W(4)-O(22) <sup>i</sup>                   | 94.3(7)  |
| W(2)-O(18) <sup>i</sup>   | 1.93(2)   | O(9)-W(1)-O(1)                             | 91.0(8)   | O(10)-W(4)-O(22) <sup>i</sup>                   | 93.5(8)  |
| W(3)-O(15)                | 1.729(18) | O(17)-W(1)-O(2)                            | 93.2(7)   | O(7)-W(5)-O(11)                                 | 102.9(9) |
| W(3)-O(8)                 | 1.84(2)   | O(13)-W(1)-O(2)                            | 87.9(8)   | O(7)-W(5)-O(12) <sup>i</sup>                    | 100.6(9) |
| W(3)-O(18)                | 1.84(2)   | O(20)-W(2)-O(9)                            | 101.7(9)  | O(7)-W(5)-O(4)                                  | 103.8(9) |
| W(3)-O(3) <sup>i</sup>    | 1.870(16) | O(20)-W(2)-O(14)                           | 99.2(9)   | O(11)-W(5)-O(4)                                 | 86.9(9)  |
| W(3)-O(11)                | 1.93(2)   | O(20)-W(2)-O(10)                           | 103.2(9)  | O(12) <sup>i</sup> -W(5)-O(4)                   | 86.3(10) |
| W(4)-O(19)                | 1.615(19) | O(9)-W(2)-O(10)                            | 85.8(7)   | O(7)-W(5)-O(17) <sup>i</sup>                    | 102.1(8) |
| W(4)-O(4)                 | 1.84(2)   | O(14)-W(2)-O(10)                           | 87.9(8)   | O(11)-W(5)-O(17) <sup>i</sup>                   | 88.5(8)  |
| W(4)-O(16)                | 1.885(18) | O(20)-W(2)-O(18) <sup>i</sup>              | 102.2(9)  | O(12) <sup>i</sup> -W(5)-O(17) <sup>i</sup>     | 87.8(8)  |
| W(4)-O(10)                | 1.90(2)   | O(9)-W(2)-O(18) <sup>i</sup>               | 87.1(7)   | O(12) <sup>i</sup> -W(5)-O(22) <sup>i</sup>     | 92.5(8)  |
| W(4)-O(8)                 | 1.98(2)   | O(14)-W(2)-O(18) <sup>i</sup>              | 90.1(8)   | O(17) <sup>i</sup> -W(5)-O(22) <sup>i</sup>     | 92.5(7)  |
| W(5)-O(7)                 | 1.731(17) | O(9)-W(2)-O(21)                            | 93.4(7)   | O(11)-W(5)-O(1) <sup>i</sup>                    | 92.4(8)  |
| W(5)-O(11)                | 1.87(2)   | O(10)-W(2)-O(21)                           | 92.1(8)   | O(4)-W(5)-O(1) <sup>i</sup>                     | 92.3(9)  |
| W(5)-O(12) <sup>i</sup>   | 1.887(19) | O(15)-W(3)-O(8)                            | 100.8(10) | O(5)-W(6)-O(3)                                  | 102.2(5) |
| W(5)-O(4)                 | 1.91(2)   | O(15)-W(3)-O(18)                           | 103.6(9)  | O(5)-W(6)-O(14)                                 | 100.6(6) |
| W(5)-O(17) <sup>i</sup>   | 1.954(18) | O(15)-W(3)-O(3) <sup>i</sup>               | 103.0(7)  | O(3)-W(6)-O(14)                                 | 87.1(7)  |
| W(6)-O(5)                 | 1.72(3)   | O(8)-W(3)-O(3) <sup>i</sup>                | 86.9(8)   | O(3)-W(6)-O(21) <sup>i</sup>                    | 91.9(7)  |
| W(6)-O(3)                 | 1.918(16) | O(18)-W(3)-O(3) <sup>i</sup>               | 87.6(8)   | O(14)-W(6)-O(21) <sup>i</sup>                   | 94.1(8)  |
| W(6)-O(14)                | 1.97(2)   | O(15)-W(3)-O(11)                           | 101.3(8)  | O(23)-W(7)-O(13)                                | 104.5(6) |
| W(7)-O(23)                | 1.63(3)   | O(8)-W(3)-O(11)                            | 89.2(9)   | O(23)-W(7)-O(12)                                | 103.1(6) |
| W(7)-O(13)                | 1.75(3)   | O(18)-W(3)-O(11)                           | 86.2(9)   | O(13)-W(7)-O(12)                                | 87.8(8)  |
| W(7)-O(12)                | 1.890(19) | O(18)-W(3)-O(22) <sup>i</sup>              | 90.3(8)   | O(24) <sup>ii</sup> -Zn(1)-O(24) <sup>iii</sup> | 112.1(8) |
| Zn(1)-O(24) <sup>ii</sup> | 1.975(13) | O(3) <sup>i</sup> -W(3)-O(22) <sup>i</sup> | 93.3(7)   | O(24) <sup>ii</sup> -Zn(1)-O(27)                | 106.4(7) |
| Zn(1)-O(27)               | 1.996(17) | O(19)-W(4)-O(4)                            | 102.6(10) | O(24) <sup>iii</sup> -Zn(1)-O(27)               | 102.8(7) |

|                  |          |                                 |           |
|------------------|----------|---------------------------------|-----------|
| O(19)-W(4)-O(16) | 101.9(7) | O(27) <sup>i</sup> -Zn(1)-O(27) | 126.5(10) |
|------------------|----------|---------------------------------|-----------|

Symmetry transformations used to generate equivalent atoms: i)  $-x+1, y, -z+1/2$ ; ii)  $-x+3/2, y+1/2, -z+1/2$ ; iii)  $x-1/2, y+1/2, z$ .

**Table S3.** Selected bond lengths (Å) and angles (°) for **3**

| Bond length               | (Å)       | Bond angle                                 | (°)       | Bond angle                                      | (°)       |
|---------------------------|-----------|--------------------------------------------|-----------|-------------------------------------------------|-----------|
| W(1)-O(6)                 | 1.73(3)   | O(6)-W(1)-O(13)                            | 100.7(13) | O(19)-W(4)-O(4)                                 | 100.9(10) |
| W(1)-O(13)                | 1.87(2)   | O(6)-W(1)-O(17)                            | 102.9(13) | O(16)-W(4)-O(4)                                 | 88.0(8)   |
| W(1)-O(17)                | 1.868(17) | O(13)-W(1)-O(17)                           | 87.8(7)   | O(19)-W(4)-O(8)                                 | 100.1(8)  |
| W(1)-O(9)                 | 1.88(2)   | O(6)-W(1)-O(9)                             | 102.5(12) | O(4)-W(4)-O(8)                                  | 88.2(7)   |
| W(1)-O(16)                | 1.922(19) | O(17)-W(1)-O(9)                            | 88.6(6)   | O(19)-W(4)-O(10)                                | 99.5(10)  |
| W(2)-O(20)                | 1.652(16) | O(6)-W(1)-O(16)                            | 102.7(11) | O(16)-W(4)-O(10)                                | 86.4(7)   |
| W(2)-O(10)                | 1.845(19) | O(13)-W(1)-O(16)                           | 87.7(7)   | O(8)-W(4)-O(10)                                 | 89.5(7)   |
| W(2)-O(9)                 | 1.86(2)   | O(9)-W(1)-O(16)                            | 85.6(7)   | O(4)-W(4)-O(2)                                  | 93.0(7)   |
| W(2)-O(14)                | 1.93(2)   | O(9)-W(1)-O(1)                             | 90.6(9)   | O(8)-W(4)-O(2)                                  | 95.1(6)   |
| W(2)-O(18) <sup>i</sup>   | 1.93(2)   | O(16)-W(1)-O(1)                            | 90.7(8)   | O(16)-W(4)-O(22) <sup>i</sup>                   | 93.5(7)   |
| W(3)-O(15)                | 1.613(17) | O(13)-W(1)-O(2)                            | 92.1(8)   | O(10)-W(4)-O(22) <sup>i</sup>                   | 93.7(8)   |
| W(3)-O(3) <sup>i</sup>    | 1.825(18) | O(17)-W(1)-O(2)                            | 93.6(10)  | O(7)-W(5)-O(4)                                  | 100.4(8)  |
| W(3)-O(8)                 | 1.860(19) | O(20)-W(2)-O(10)                           | 100.8(8)  | O(7)-W(5)-O(17) <sup>i</sup>                    | 101.5(10) |
| W(3)-O(18)                | 1.86(2)   | O(20)-W(2)-O(9)                            | 100.6(8)  | O(7)-W(5)-O(11)                                 | 99.9(8)   |
| W(3)-O(11)                | 1.899(17) | O(10)-W(2)-O(9)                            | 86.0(8)   | O(4)-W(5)-O(11)                                 | 87.6(8)   |
| W(4)-O(19)                | 1.657(19) | O(20)-W(2)-O(14)                           | 102.9(9)  | O(17) <sup>i</sup> -W(5)-O(11)                  | 89.4(7)   |
| W(4)-O(16)                | 1.82(2)   | O(10)-W(2)-O(14)                           | 88.8(9)   | O(7)-W(5)-O(12) <sup>i</sup>                    | 99.3(9)   |
| W(4)-O(4)                 | 1.89(2)   | O(20)-W(2)-O(18) <sup>i</sup>              | 99.4(9)   | O(4)-W(5)-O(12) <sup>i</sup>                    | 91.7(10)  |
| W(4)-O(8)                 | 1.936(17) | O(9)-W(2)-O(18) <sup>i</sup>               | 87.2(8)   | O(17) <sup>i</sup> -W(5)-O(12) <sup>i</sup>     | 84.1(8)   |
| W(4)-O(10)                | 1.96(2)   | O(14)-W(2)-O(18) <sup>i</sup>              | 89.8(7)   | O(4)-W(5)-O(1) <sup>i</sup>                     | 98.0(8)   |
| W(5)-O(7)                 | 1.704(16) | O(10)-W(2)-O(21)                           | 97.2(8)   | O(11)-W(5)-O(1) <sup>i</sup>                    | 94.2(8)   |
| W(5)-O(4)                 | 1.86(2)   | O(9)-W(2)-O(21)                            | 91.0(8)   | O(17) <sup>i</sup> -W(5)-O(22) <sup>i</sup>     | 93.7(9)   |
| W(5)-O(17) <sup>i</sup>   | 1.88(2)   | O(15)-W(3)-O(3) <sup>i</sup>               | 101.8(9)  | O(12) <sup>i</sup> -W(5)-O(22) <sup>i</sup>     | 95.9(9)   |
| W(5)-O(11)                | 1.887(19) | O(15)-W(3)-O(8)                            | 103.7(8)  | O(5)-W(6)-O(14)                                 | 99.8(7)   |
| W(5)-O(12) <sup>i</sup>   | 1.92(2)   | O(3) <sup>i</sup> -W(3)-O(8)               | 85.6(7)   | O(5)-W(6)-O(3)                                  | 101.1(6)  |
| W(6)-O(5)                 | 1.74(2)   | O(15)-W(3)-O(18)                           | 97.0(10)  | O(14)-W(6)-O(3)                                 | 88.7(8)   |
| W(6)-O(14)                | 1.86(2)   | O(3) <sup>i</sup> -W(3)-O(18)              | 91.7(8)   | O(14)-W(6)-O(21) <sup>i</sup>                   | 95.2(9)   |
| W(6)-O(3)                 | 1.974(17) | O(15)-W(3)-O(11)                           | 98.2(9)   | O(3)-W(6)-O(21) <sup>i</sup>                    | 95.6(7)   |
| W(7)-O(23)                | 1.62(3)   | O(8)-W(3)-O(11)                            | 87.6(7)   | O(23)-W(7)-O(12)                                | 100.5(7)  |
| W(7)-O(12)                | 1.85(2)   | O(18)-W(3)-O(11)                           | 88.0(8)   | O(23)-W(7)-O(13)                                | 101.7(6)  |
| W(7)-O(13)                | 1.90(2)   | O(8)-W(3)-O(21) <sup>i</sup>               | 94.0(8)   | O(12)-W(7)-O(13)                                | 85.0(9)   |
| Zn(1)-O(26)               | 1.911(18) | O(11)-W(3)-O(21) <sup>i</sup>              | 93.5(9)   | O(26) <sup>i</sup> -Zn(1)-O(26)                 | 123.3(12) |
| Zn(1)-O(24) <sup>ii</sup> | 1.969(12) | O(3) <sup>i</sup> -W(3)-O(22) <sup>i</sup> | 92.5(8)   | O(26)-Zn(1)-O(24) <sup>ii</sup>                 | 94.0(7)   |
|                           |           | O(18)-W(3)-O(22) <sup>i</sup>              | 94.8(10)  | O(26)-Zn(1)-O(24) <sup>iii</sup>                | 118.5(7)  |
|                           |           | O(19)-W(4)-O(16)                           | 102.7(8)  | O(24) <sup>ii</sup> -Zn(1)-O(24) <sup>iii</sup> | 109.8(8)  |

Symmetry transformations used to generate equivalent atoms: i)  $-x+1, y, -z+1/2$ ; ii)  $x-1/2, y+1/2, z$ ; iii)  $-x+3/2, y+1/2, -z+1/2$ .

**Table S4.** Selected bond lengths (Å) and angles (°) for **4**

| Bond length               | (Å)       | Bond angle                    | (°)       | Bond angle                                      | (°)       |
|---------------------------|-----------|-------------------------------|-----------|-------------------------------------------------|-----------|
| W(1)-O(6)                 | 1.59(2)   | O(6)-W(1)-O(9)                | 103.8(10) | O(19)-W(4)-O(16)                                | 98.1(8)   |
| W(1)-O(9)                 | 1.85(2)   | O(6)-W(1)-O(17)               | 104.5(10) | O(10)-W(4)-O(16)                                | 91.5(8)   |
| W(1)-O(17)                | 1.86(2)   | O(9)-W(1)-O(17)               | 86.4(7)   | O(19)-W(4)-O(8)                                 | 103.2(8)  |
| W(1)-O(13)                | 1.862(18) | O(6)-W(1)-O(13)               | 96.9(10)  | O(10)-W(4)-O(8)                                 | 85.7(8)   |
| W(1)-O(16)                | 1.924(17) | O(17)-W(1)-O(13)              | 88.9(7)   | O(19)-W(4)-O(4)                                 | 106.6(10) |
| W(2)-O(20)                | 1.61(2)   | O(6)-W(1)-O(16)               | 97.5(10)  | O(16)-W(4)-O(4)                                 | 87.8(9)   |
| W(2)-O(14)                | 1.88(2)   | O(9)-W(1)-O(16)               | 88.5(7)   | O(8)-W(4)-O(4)                                  | 85.0(9)   |
| W(2)-O(9)                 | 1.91(2)   | O(13)-W(1)-O(16)              | 88.3(7)   | O(10)-W(4)-O(22)                                | 94.5(9)   |
| W(2)-O(18) <sup>i</sup>   | 1.92(2)   | O(9)-W(1)-O(1)                | 94.3(8)   | O(16)-W(4)-O(22)                                | 94.3(9)   |
| W(2)-O(10)                | 1.97(2)   | O(16)-W(1)-O(1)               | 92.3(8)   | O(19)-W(4)-O(2)                                 | 157.6(7)  |
| W(3)-O(15)                | 1.628(19) | O(17)-W(1)-O(2)               | 91.8(8)   | O(8)-W(4)-O(2)                                  | 94.5(7)   |
| W(3)-O(18)                | 1.77(2)   | O(13)-W(1)-O(2)               | 94.3(8)   | O(4)-W(4)-O(2)                                  | 88.1(8)   |
| W(3)-O(3) <sup>i</sup>    | 1.794(18) | O(20)-W(2)-O(14)              | 98.9(9)   | O(7)-W(5)-O(4)                                  | 104.7(10) |
| W(3)-O(8)                 | 1.80(2)   | O(20)-W(2)-O(9)               | 103.1(9)  | O(7)-W(5)-O(12) <sup>i</sup>                    | 99.5(9)   |
| W(3)-O(11)                | 1.95(2)   | O(20)-W(2)-O(18) <sup>i</sup> | 104.9(9)  | O(4)-W(5)-O(12) <sup>i</sup>                    | 87.5(11)  |
| W(4)-O(19)                | 1.594(19) | O(14)-W(2)-O(18) <sup>i</sup> | 87.1(8)   | O(7)-W(5)-O(11)                                 | 100.1(9)  |
| W(4)-O(10)                | 1.77(2)   | O(9)-W(2)-O(18) <sup>i</sup>  | 87.4(7)   | O(4)-W(5)-O(11)                                 | 86.0(10)  |
| W(4)-O(16)                | 1.84(2)   | O(20)-W(2)-O(10)              | 101.8(9)  | O(7)-W(5)-O(17) <sup>i</sup>                    | 102.7(9)  |
| W(4)-O(8)                 | 1.915(19) | O(14)-W(2)-O(10)              | 86.5(7)   | O(12) <sup>i</sup> -W(5)-O(17) <sup>i</sup>     | 89.4(8)   |
| W(4)-O(4)                 | 1.92(3)   | O(9)-W(2)-O(10)               | 89.0(7)   | O(11)-W(5)-O(17) <sup>i</sup>                   | 87.9(8)   |
| W(5)-O(7)                 | 1.656(17) | O(9)-W(2)-O(21)               | 94.5(8)   | O(12) <sup>i</sup> -W(5)-O(22)                  | 93.6(9)   |
| W(5)-O(4)                 | 1.71(3)   | O(10)-W(2)-O(21)              | 92.1(8)   | O(17) <sup>i</sup> -W(5)-O(22)                  | 94.5(9)   |
| W(5)-O(12) <sup>i</sup>   | 1.82(2)   | O(14)-W(2)-O(2)               | 95.8(8)   | O(5)-W(6)-O(14)                                 | 101.0(6)  |
| W(5)-O(11)                | 1.83(2)   | O(18) <sup>i</sup> -W(2)-O(2) | 89.5(8)   | O(5)-W(6)-O(3)                                  | 102.2(5)  |
| W(5)-O(17) <sup>i</sup>   | 1.85(2)   | O(15)-W(3)-O(18)              | 102.7(9)  | O(14)-W(6)-O(3)                                 | 88.1(7)   |
| W(6)-O(5)                 | 1.59(3)   | O(15)-W(3)-O(3) <sup>i</sup>  | 101.1(8)  | O(14)-W(6)-O(21) <sup>i</sup>                   | 94.5(8)   |
| W(6)-O(14)                | 1.86(2)   | O(18)-W(3)-O(3) <sup>i</sup>  | 89.2(8)   | O(3)-W(6)-O(21) <sup>i</sup>                    | 92.2(7)   |
| W(6)-O(3)                 | 1.933(19) | O(15)-W(3)-O(8)               | 102.2(9)  | O(13)-W(7)-O(12)                                | 88.7(8)   |
| W(7)-O(23)                | 1.61(3)   | O(3) <sup>i</sup> -W(3)-O(8)  | 86.5(8)   | O(13) <sup>i</sup> -W(7)-O(1)                   | 95.3(7)   |
| W(7)-O(13)                | 1.87(2)   | O(15)-W(3)-O(11)              | 101.0(9)  | O(12) <sup>i</sup> -W(7)-O(1)                   | 89.8(8)   |
| W(7)-O(12)                | 1.92(2)   | O(18)-W(3)-O(11)              | 87.1(9)   | O(23)-W(7)-O(13)                                | 101.8(6)  |
| Zn(1)-O(27)               | 1.93(2)   | O(8)-W(3)-O(11)               | 87.7(8)   | O(23)-W(7)-O(12)                                | 102.2(6)  |
| Zn(1)-O(24) <sup>ii</sup> | 1.992(13) | O(8)-W(3)-O(21) <sup>i</sup>  | 94.1(8)   | O(27) <sup>i</sup> -Zn(1)-O(27)                 | 127.1(11) |
|                           |           | O(11)-W(3)-O(21) <sup>i</sup> | 94.4(8)   | O(27)-Zn(1)-O(24) <sup>ii</sup>                 | 105.1(7)  |
|                           |           | O(18)-W(3)-O(22)              | 92.7(9)   | O(27)-Zn(1)-O(24) <sup>iii</sup>                | 104.1(8)  |
|                           |           | O(3) <sup>i</sup> -W(3)-O(22) | 94.0(8)   | O(24) <sup>ii</sup> -Zn(1)-O(24) <sup>iii</sup> | 111.2(8)  |
|                           |           | O(19)-W(4)-O(10)              | 100.6(9)  |                                                 |           |

Symmetry transformations used to generate equivalent atoms: i)  $-x+1, y, -z+1/2$ ; ii)  $x-1/2, y+1/2, z$ ; iii)  $-x+3/2, y+1/2, -z+1/2$ .

**Table S5.** Selected bond lengths (Å) and angles (°) for **5**

| Bond length               | (Å)       | Bond angle                                | (°)       | Bond angle                                      | (°)       |
|---------------------------|-----------|-------------------------------------------|-----------|-------------------------------------------------|-----------|
| W(1)-O(6)                 | 1.60(2)   | O(6)-W(1)-O(19)                           | 93.6(14)  | O(16)-W(4)-O(8)                                 | 99.0(12)  |
| W(1)-O(19)                | 1.68(2)   | O(6)-W(1)-O(4)                            | 101.8(14) | O(10)-W(4)-O(8)                                 | 88.5(14)  |
| W(1)-O(4)                 | 1.82(3)   | O(6)-W(1)-O(18)                           | 96.6(13)  | O(16)-W(4)-O(12)                                | 101.2(13) |
| W(1)-O(18)                | 1.83(2)   | O(19)-W(1)-O(18)                          | 94.0(11)  | O(17)-W(4)-O(12)                                | 88.2(14)  |
| W(1)-O(17)                | 1.89(3)   | O(4)-W(1)-O(18)                           | 84.2(11)  | O(8)-W(4)-O(12)                                 | 85.0(13)  |
| W(1)-O(2)                 | 2.09(4)   | O(6)-W(1)-O(17)                           | 103.8(13) | O(10)-W(4)-O(1)                                 | 94.0(13)  |
| W(2)-O(20)                | 1.60(2)   | O(19)-W(1)-O(17)                          | 86.7(11)  | O(17)-W(4)-O(1)                                 | 102.4(9)  |
| W(2)-O(9)                 | 1.81(3)   | O(4)-W(1)-O(17)                           | 89.8(11)  | O(8)-W(4)-O(21)                                 | 103.3(13) |
| W(2)-O(14)                | 1.89(2)   | O(4)-W(1)-O(2)                            | 97.2(12)  | O(12)-W(4)-O(21)                                | 99.3(14)  |
| W(2)-O(4)                 | 1.91(3)   | O(17)-W(1)-O(2)                           | 95.7(11)  | O(7)-W(5)-O(12)                                 | 103.0(12) |
| W(2)-O(10)                | 1.98(3)   | O(19)-W(1)-O(21)                          | 106.4(13) | O(7)-W(5)-O(11)                                 | 96.6(13)  |
| W(3)-O(15)                | 1.57(2)   | O(18)-W(1)-O(21)                          | 105.2(12) | O(12)-W(5)-O(11)                                | 86.4(14)  |
| W(3)-O(3) <sup>i</sup>    | 1.78(3)   | O(20)-W(2)-O(9)                           | 106.3(12) | O(7)-W(5)-O(13) <sup>i</sup>                    | 101.9(15) |
| W(3)-O(9) <sup>i</sup>    | 1.81(3)   | O(20)-W(2)-O(14)                          | 98.3(12)  | O(12)-W(5)-O(13) <sup>i</sup>                   | 90.7(15)  |
| W(3)-O(8)                 | 1.92(3)   | O(9)-W(2)-O(14)                           | 83.7(11)  | O(7)-W(5)-O(18) <sup>i</sup>                    | 97.2(11)  |
| W(3)-O(11)                | 1.97(3)   | O(20)-W(2)-O(4)                           | 103.8(12) | O(11)-W(5)-O(18) <sup>i</sup>                   | 89.7(10)  |
| W(3)-O(1)                 | 2.06(3)   | O(9)-W(2)-O(4)                            | 85.2(12)  | O(13) <sup>i</sup> -W(5)-O(18) <sup>i</sup>     | 86.6(11)  |
| W(4)-O(16)                | 1.616(19) | O(20)-W(2)-O(10)                          | 102.9(11) | O(12)-W(5)-O(2) <sup>i</sup>                    | 102.3(12) |
| W(4)-O(10)                | 1.73(3)   | O(14)-W(2)-O(10)                          | 89.2(12)  | O(11)-W(5)-O(2) <sup>i</sup>                    | 102.6(12) |
| W(4)-O(17)                | 1.78(3)   | O(4)-W(2)-O(10)                           | 90.8(12)  | O(13) <sup>i</sup> -W(5)-O(1)                   | 103.7(12) |
| W(4)-O(8)                 | 1.85(3)   | O(9)-W(2)-O(21)                           | 96.6(13)  | O(18) <sup>i</sup> -W(5)-O(1)                   | 104.0(10) |
| W(4)-O(12)                | 1.88(4)   | O(14)-W(2)-O(21)                          | 102.3(13) | O(5)-W(6)-O(14)                                 | 99.2(8)   |
| W(5)-O(7)                 | 1.58(3)   | O(4)-W(2)-O(22) <sup>i</sup>              | 100.8(10) | O(5)-W(6)-O(3)                                  | 101.4(7)  |
| W(5)-O(12)                | 1.82(3)   | O(10)-W(2)-O(22) <sup>i</sup>             | 97.6(10)  | O(14)-W(6)-O(3)                                 | 85.6(9)   |
| W(5)-O(11)                | 1.83(3)   | O(15)-W(3)-O(3) <sup>i</sup>              | 102.2(13) | O(14)-W(6)-O(22)                                | 99.5(11)  |
| W(5)-O(13) <sup>i</sup>   | 1.95(4)   | O(15)-W(3)-O(9) <sup>i</sup>              | 104.7(12) | O(3)-W(6)-O(22)                                 | 100.9(10) |
| W(5)-O(18) <sup>i</sup>   | 2.01(2)   | O(3) <sup>i</sup> -W(3)-O(9) <sup>i</sup> | 87.0(11)  | O(23)-W(7)-O(13)                                | 99.9(12)  |
| W(6)-O(14)                | 1.88(2)   | O(15)-W(3)-O(8)                           | 102.5(12) | O(23)-W(7)-O(19)                                | 100.2(6)  |
| W(6)-O(3)                 | 1.96(3)   | O(3) <sup>i</sup> -W(3)-O(8)              | 88.6(10)  | O(13)-W(7)-O(19)                                | 87.7(12)  |
| W(6)-O(22)                | 2.06(3)   | O(15)-W(3)-O(11)                          | 98.1(13)  | O(13) <sup>i</sup> -W(7)-O(2)                   | 99.8(14)  |
| W(7)-O(23)                | 1.57(4)   | O(9) <sup>i</sup> -W(3)-O(11)             | 88.8(12)  | O(19) <sup>i</sup> -W(7)-O(2)                   | 103.7(12) |
| W(7)-O(13)                | 1.78(4)   | O(8)-W(3)-O(11)                           | 86.1(11)  | O(2)-Co(1)-O(21) <sup>i</sup>                   | 114(2)    |
| W(7)-O(19)                | 2.18(2)   | O(3) <sup>i</sup> -W(3)-O(1)              | 94.0(13)  | O(2)-Co(1)-O(1)                                 | 112.9(14) |
| Co(1)-O(2)                | 1.914(10) | O(9) <sup>i</sup> -W(3)-O(1)              | 96.6(12)  | O(21) <sup>i</sup> -Co(1)-O(1)                  | 111.6(17) |
| Co(1)-O(21)               | 1.921(10) | O(8)-W(3)-O(22)                           | 97.7(11)  | O(21)-Co(1)-O(22)                               | 103.3(18) |
| Co(1)-O(1)                | 1.923(10) | O(11)-W(3)-O(22)                          | 105.1(11) | O(1) <sup>i</sup> -Co(1)-O(22)                  | 100.8(15) |
| Co(1)-O(22)               | 1.924(10) | O(16)-W(4)-O(10)                          | 102.6(13) | O(24) <sup>ii</sup> -Zn(1)-O(24) <sup>iii</sup> | 112.7(12) |
| Zn(1)-O(24) <sup>ii</sup> | 1.945(19) | O(16)-W(4)-O(17)                          | 102.9(11) | O(24) <sup>ii</sup> -Zn(1)-O(27)                | 104.1(10) |
| Zn(1)-O(27)               | 1.96(3)   | O(10)-W(4)-O(17)                          | 89.3(12)  | O(27) <sup>iv</sup> -Zn(1)-O(27)                | 127.6(17) |

Symmetry transformations used to generate equivalent atoms: i)  $-x+1, y, -z+1/2$ ; ii)  $-x+3/2, y-1/2, -z+3/2$ ; iii)  $x+1/2, y-1/2, z$ ; iv)  $-x+2, y, -z+3/2$ .
